# Supplementary material for: UTR introns, antisense RNA and differentially spliced transcripts between Plasmodium yoelii subspecies
Source: Springer Nature journal article supplement (doi:10.1186/s12936-015-1081-9), 2016-01-20

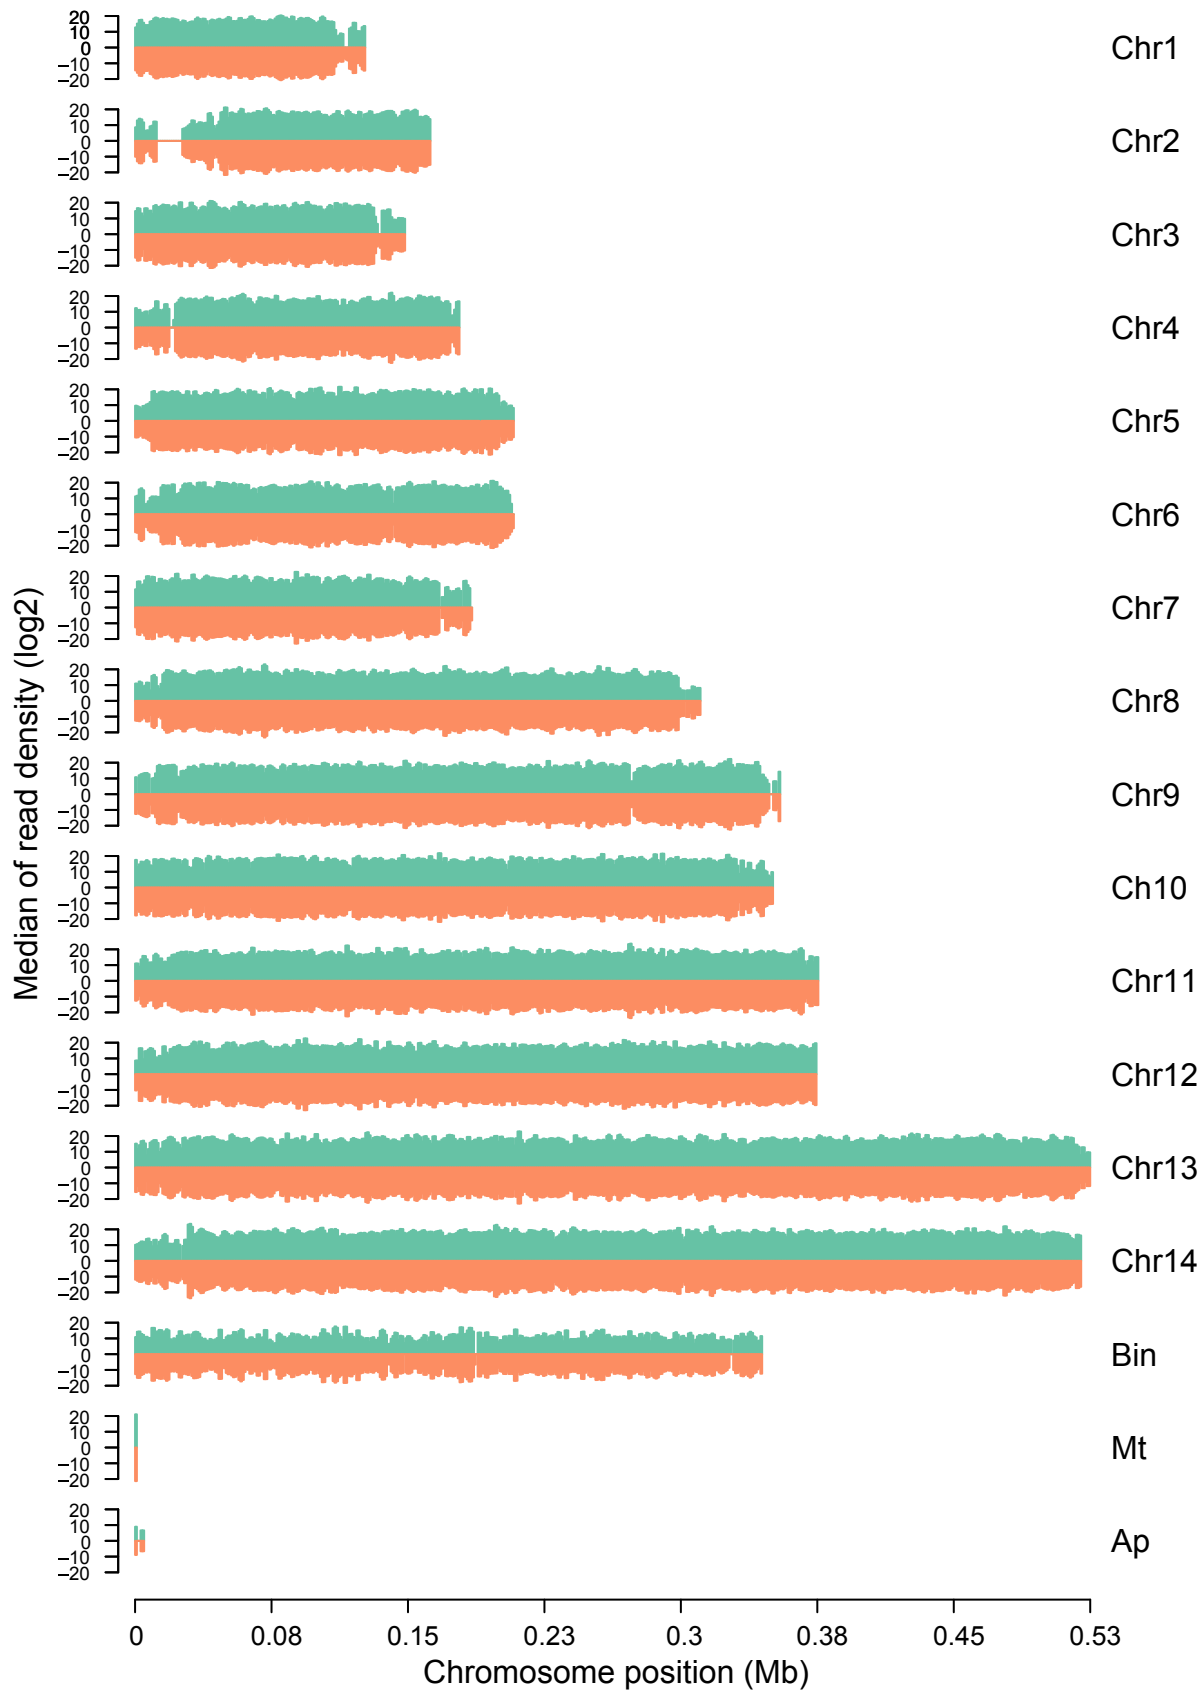

Supplement: MOESM3 [file 9762028]
